# Supplementary material for: Transdermal vaccination via 3D-printed microneedles induces potent humoral and cellular immunity
Source: PubMed Central journal article supplement — Proc Natl Acad Sci U S A. 2021 Sep 22;118(39):e2102595118. doi: 10.1073/pnas.2102595118 (PMC8488660; doi:10.1073/pnas.2102595118), 2021-09-22
Supplement: pnas.2102595118.sapp.pdf [file pnas.2102595118.sapp.pdf]

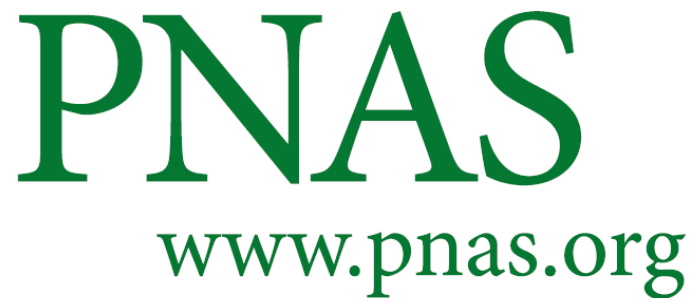

## **Supplementary Information for**

### **Transdermal Vaccination via 3D Printed Microneedles Induces Potent Humoral and Cellular Immunity**

Cassie Caudill<sup>1</sup>, Jillian L. Perry<sup>2</sup>, Kimon Iliadis<sup>1</sup>, Addis T. Tessema<sup>1</sup>, Brian J. Lee<sup>4</sup>, Beverly S. Mecham<sup>1</sup>, Shaomin Tian<sup>3\*</sup>, Joseph M. DeSimone<sup>1,2,4\*</sup>

<sup>1</sup>Lineberger Comprehensive Cancer Center, University of North Carolina, Chapel Hill, NC 27599, USA.

<sup>2</sup>Eshelman School of Pharmacy, University of North Carolina, Chapel Hill, NC 27599, USA.

<sup>3</sup>Department of Microbiology and Immunology, University of North Carolina, Chapel Hill, NC 27599, USA.

<sup>4</sup>Departments of Radiology and Chemical Engineering, Stanford University, Stanford, CA 94305, USA.

\*Corresponding authors:

Joseph M. DeSimone: [jmdesimone@stanford.edu](mailto:jmdesimone@stanford.edu)

Shaomin Tian: [smtian@email.unc.edu](mailto:smtian@email.unc.edu)

### **This PDF file includes:**

Figures S1 to S7

**A**

| Coating formulations | Components      | Weight Percentage (wt%) |
|----------------------|-----------------|-------------------------|
| OVA                  | Methylcellulose | 3.4                     |
|                      | Sucrose         | 21                      |
|                      | OVA             | 7                       |
| CpG                  | Methylcellulose | 3.4                     |
|                      | Sucrose         | 21                      |
|                      | CpG             | 1.2                     |

**B**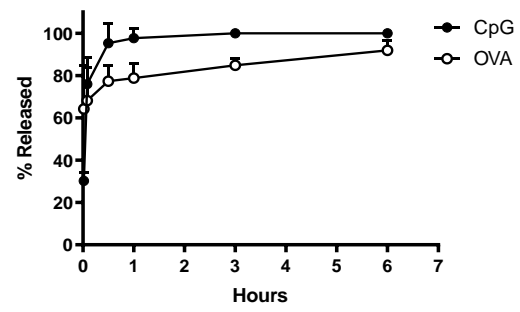

**Fig. S1.** Cargo coating formulations (A) and release profiles from coated square pyramidal MNs (B). Data are presented as mean  $\pm$  standard deviation (n=4).

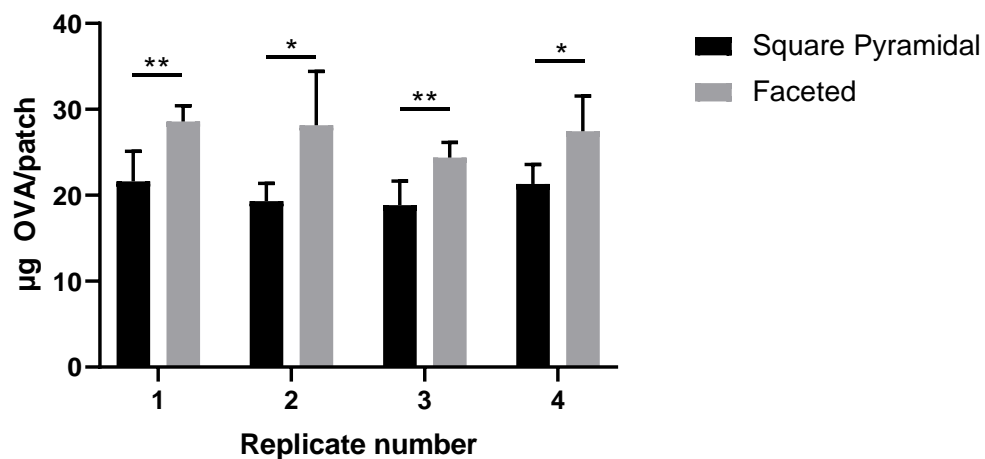

**Fig. S2.** Reproducibility of cargo coating on square pyramidal and faceted microneedle patches. Microneedles were coated with OVA utilizing 4 individually prepared coating solutions, 4-5 patches each. Cargo loading was evaluated after release in water for 2 hours at room temperature. OVA concentration was determined using a BCA assay. Data are presented as mean  $\pm$  standard deviation with unpaired *t*-tests, \*  $p < 0.05$ , \*\*  $p < 0.01$ .

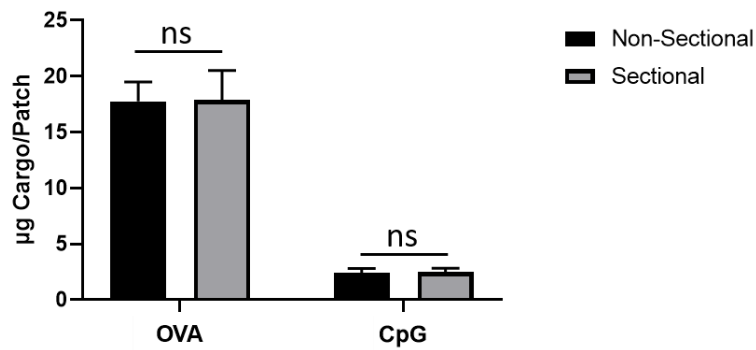

**Fig. S3.** Cargo coating on faceted microneedles. OVA and CpG were loaded on microneedles utilizing either a non-sectioned or sectioned coating mask, resulting in microneedles co-loaded with both OVA and CpG on the same needles, or OVA and CpG loaded on separate needles (70% needles for CpG and 30% for OVA). Data are presented as mean  $\pm$  standard deviation ( $n=5$ ), with unpaired  $t$ -test analysis. “ns” = not significant.

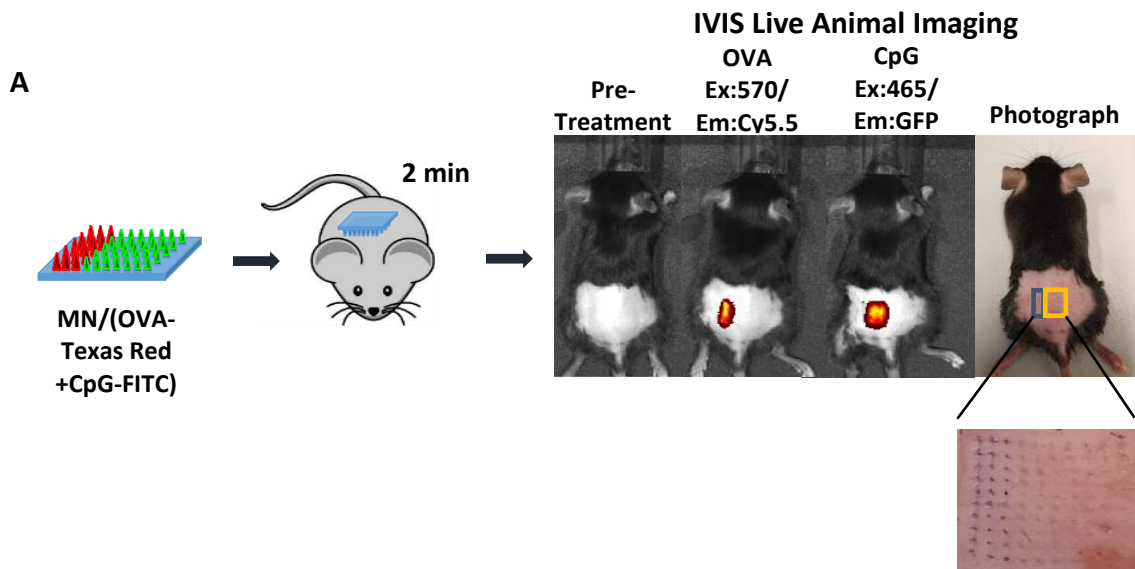

**Fig. S4.** Delivery of cargos in mouse skin via MN patches. C57BL/6 mice were shaved and nair-treated in the lower back, then applied with a MN patch co-coated with OVA-Texas Red and CpG-fluorescein for 2 min and removed. The mice were imaged with IVIS Lumina at two fluorescence channels as labeled. A representative fluorescence image is presented to show OVA and CpG fluorescence. In addition, a photograph of mouse after application of MN shows the skin indentations from needles and cargos left in the pores.

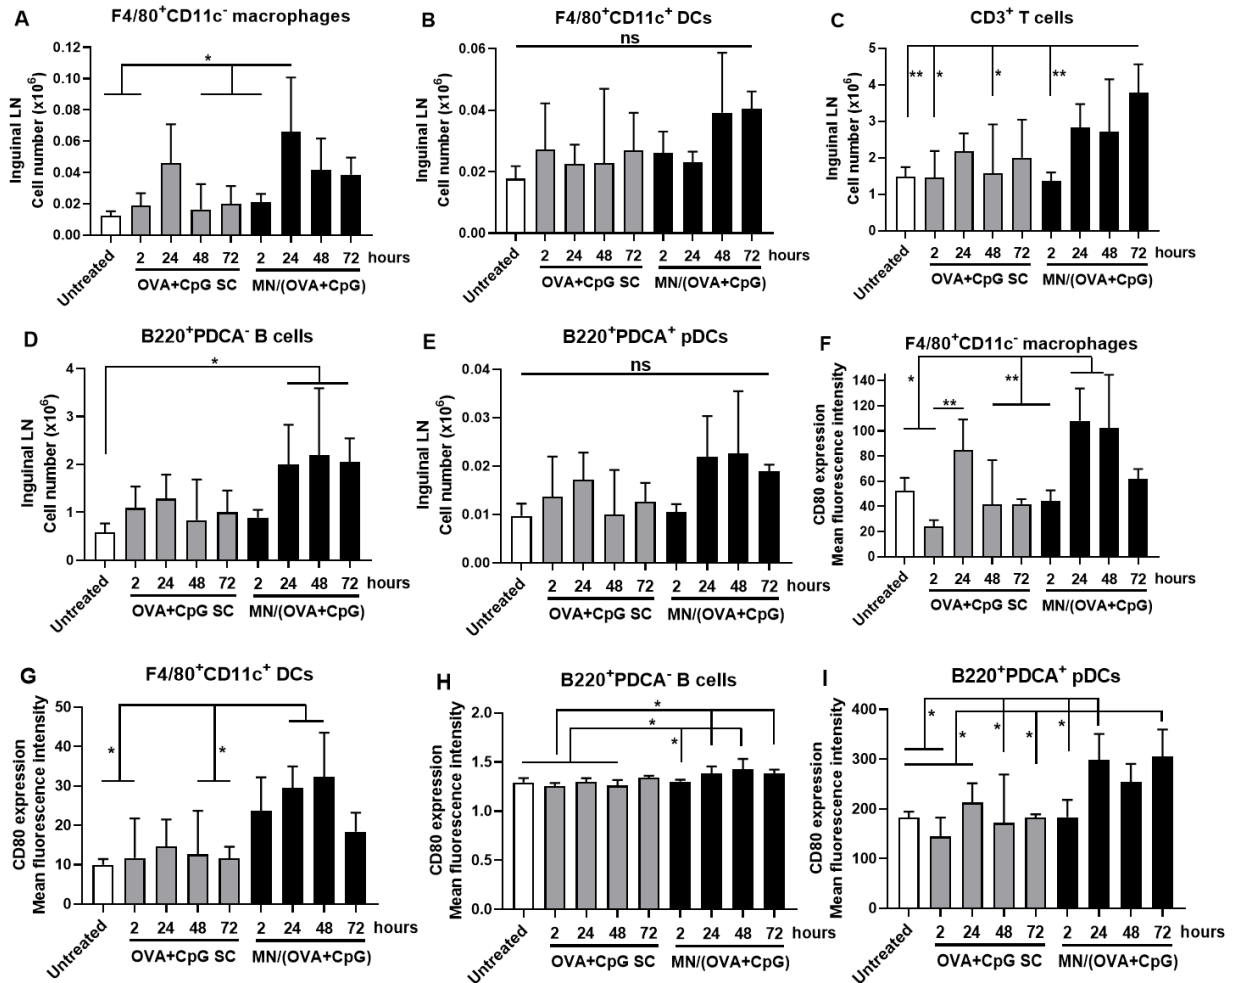

**Fig. S5.** Immune cell population (A-E) and CD80 expression in mean fluorescence intensity (F-I) in the draining inguinal LNs, after application of MNs or injections of soluble formulations. Data are presented as mean  $\pm$  standard deviation of samples from individual animals,  $n=4$ . Statistical analysis was done by One-way ANOVA. \*  $p < 0.05$ , \*\*  $p < 0.01$ , \*\*\*  $p < 0.001$ . "ns" = not significant.

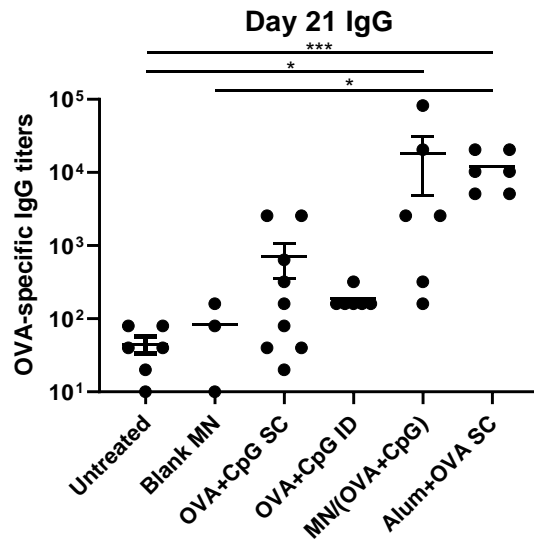

**Fig. S6.** Vaccine induced humoral immune responses on day 21 post immunization. Data are presented as mean  $\pm$  standard deviation of samples from individual animals, n=6-9. Statistical analysis was done by One-way ANOVA. \*  $p < 0.05$ , \*\*\*  $p < 0.001$ .

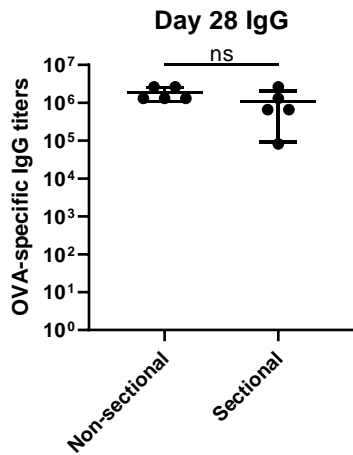

**Fig. S7.** Humoral immune responses to faceted microneedles co-loaded with OVA and CpG via non-un-sectioned or sectioned coating mask. Female C57BL/6 mice received two immunizations on days 0 and 21, with OVA and CpG levels shown in Figure S3. Data are presented as mean  $\pm$  standard deviation of samples from individual animals (n=5), with unpaired student's *t*-test analysis. "ns" = not significant.
